# Supplementary material for: Spatially varying cis-regulatory divergence in Drosophila embryos elucidates cis-regulatory logic
Source: PLoS Genet. 2018 Nov 1;14(11):e1007631. doi: 10.1371/journal.pgen.1007631 (PMC6211617; doi:10.1371/journal.pgen.1007631)
Supplement: S2 Table — (XLSX) [file pgen.1007631.s002.xlsx]

## Sheet: hb_model
Logit Regression Results
Dep. Variable:	T3	No. Observations:	4884
Model:	Logit	Df Residuals:	4871
Method:	MLE	Df Model:	12
Date:	Fri	10 Aug 2018	Pseudo R-squ.:	0.6391
Time:	17:03:58	Log-Likelihood:	-580.55
converged:	True	LL-Null:	-1608.7
		LLR p-value:	0
	coef	std err	z	P>|z|	[0.025	0.975]
bcdP2	-92.0808	5.249	-17.543	0	-102.368	-81.793
cad	-0.3796	1.673	-0.227	0.821	-3.659	2.9
kni	-11.6206	0.787	-14.765	0	-13.163	-10.078
h	-1.7576	0.736	-2.387	0.017	-3.201	-0.314
bcdP	69.338	3.734	18.57	0	62.02	76.656
D	7.5322	0.659	11.432	0	6.241	8.824
const	-0.3712	0.734	-0.506	0.613	-1.809	1.067
KrP	-11.5487	0.675	-17.109	0	-12.872	-10.226
tll	-13.9656	1.379	-10.125	0	-16.669	-11.262
twi	6.6254	1.61	4.115	0	3.47	9.781
sna	-11.8296	1.833	-6.455	0	-15.421	-8.238
gtP	-17.5613	0.824	-21.322	0	-19.176	-15.947
hkb	-6.831	2.364	-2.89	0.004	-11.464	-2.198
